# Supplementary material for: Hesitancy of Arab Healthcare Workers towards COVID-19 Vaccination: A Large-Scale Multinational Study
Source: MDPI journal article supplement (doi:10.3390/vaccines9050446), 2021-05-02
Supplement: s1 [file s1]

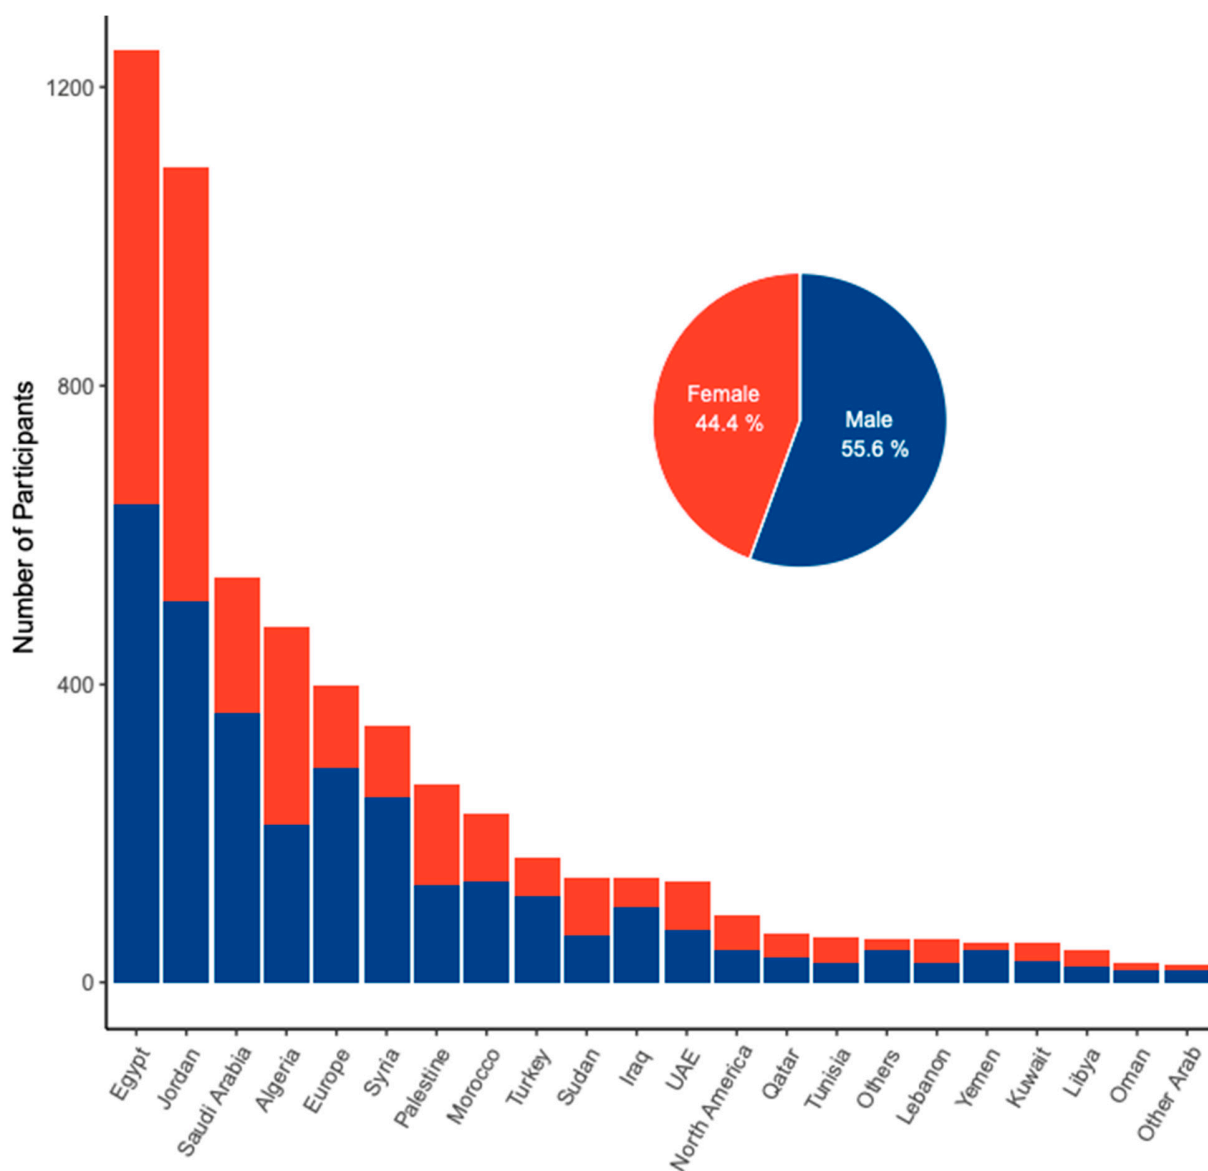

**Supplementary Figure S1.** A bar plot and a pie chart showing distribution of participants according to country of residence and gender.

A

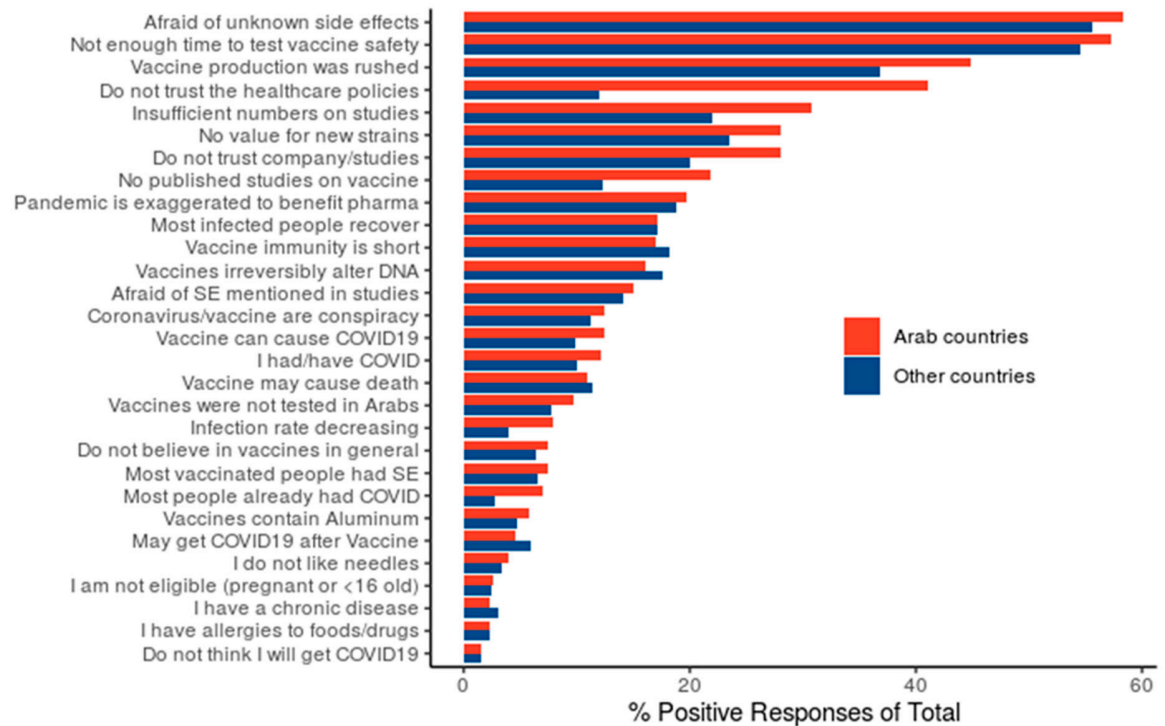

B

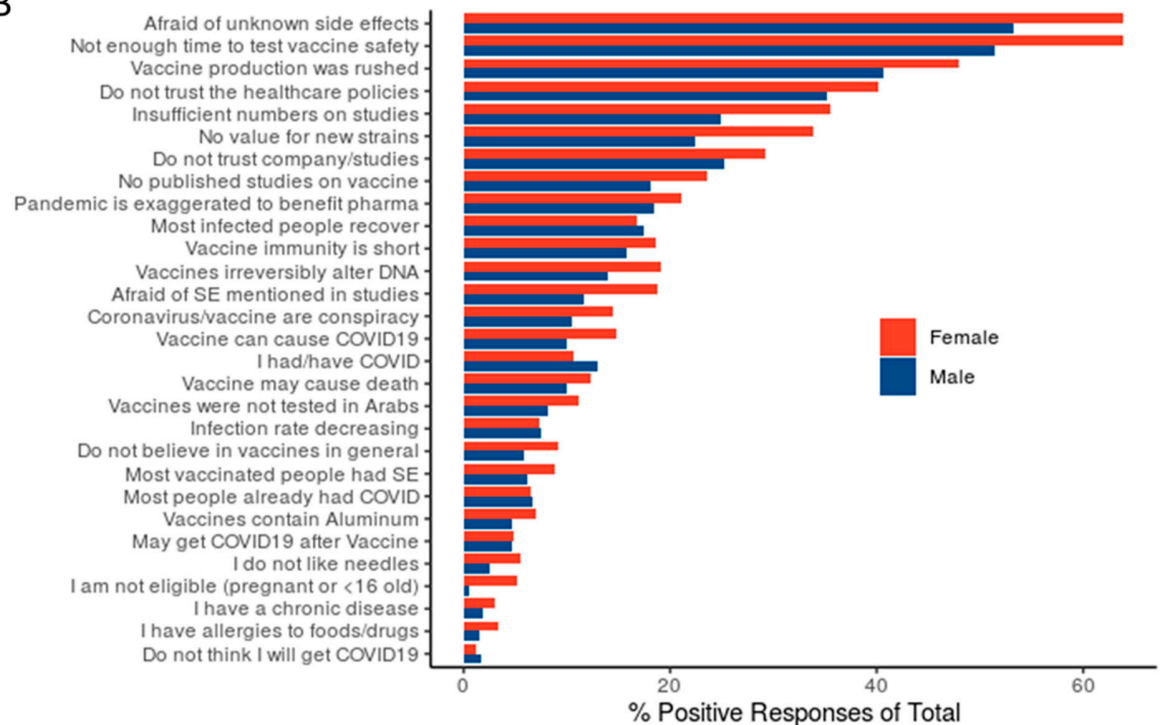

**Supplementary Figure S2.** Barplot comparing barriers of HCWs in Arab countries with their counterparts outside (panel A), and barriers of female HCWs with male counterparts (panel B).

**Supplementary Table S1.** Comparison between HCW and non-HCW participants

| Label                       | levels           | HCW  |        | Not HCW |        | Total |        |
|-----------------------------|------------------|------|--------|---------|--------|-------|--------|
|                             |                  | N    | %      | N       | %      | N     | %      |
| <b>Age</b>                  | Below 30         | 3033 | 53.1%  | 12738   | 41.7%  | 15771 | 43.5%  |
|                             | 30-39            | 1649 | 28.9%  | 9916    | 32.5%  | 11565 | 31.9%  |
|                             | 40-49            | 692  | 12.1%  | 5227    | 17.1%  | 5919  | 16.3%  |
|                             | 50-59            | 261  | 4.6%   | 2040    | 6.7%   | 2301  | 6.4%   |
|                             | Over 59          | 73   | 1.3%   | 591     | 1.9%   | 664   | 1.8%   |
| <b>Chronic Diseases</b>     | No               | 4908 | 86.0%  | 25473   | 83.5%  | 30381 | 83.9%  |
|                             | Yes              | 800  | 14.0%  | 5039    | 16.5%  | 5839  | 16.1%  |
| <b>Country</b>              | Arab countries   | 4996 | 87.5%  | 25204   | 82.6%  | 30200 | 83.4%  |
|                             | Other countries  | 712  | 12.5%  | 5308    | 17.4%  | 6020  | 16.6%  |
| <b>Academic Education</b>   | Higher education | 3875 | 67.9%  | 18361   | 60.2%  | 22236 | 61.4%  |
|                             | Lower education  | 1833 | 32.1%  | 12151   | 39.8%  | 13984 | 38.6%  |
| <b>Had Covid</b>            | No               | 2579 | 45.2%  | 15546   | 51.0%  | 18125 | 50.0%  |
|                             | Not sure         | 1859 | 32.6%  | 9599    | 31.5%  | 11458 | 31.6%  |
|                             | Yes              | 1270 | 22.2%  | 5367    | 17.6%  | 6637  | 18.3%  |
| <b>Gender</b>               | Male             | 3171 | 55.6%  | 18869   | 61.8%  | 22040 | 60.9%  |
|                             | Female           | 2537 | 44.4%  | 11643   | 38.2%  | 14180 | 39.1%  |
| <b>Vaccine Type Unknown</b> | No               | 3857 | 67.6%  | 17306   | 56.7%  | 21163 | 58.4%  |
|                             | Yes              | 1851 | 32.4%  | 13206   | 43.3%  | 15057 | 41.6%  |
| <b>Influenza Vaccine</b>    | Yearly           | 321  | 5.6%   | 587     | 1.9%   | 908   | 2.5%   |
|                             | Some years       | 681  | 11.9%  | 2230    | 7.3%   | 2911  | 8.0%   |
|                             | Rarely           | 712  | 12.5%  | 3649    | 12.0%  | 4361  | 12.0%  |
|                             | Never            | 3994 | 70.0%  | 24046   | 78.8%  | 28040 | 77.4%  |
|                             |                  |      |        |         |        |       |        |
| <b>Vaccine Hesitancy</b>    | Acceptance       | 1522 | 26.7%  | 4641    | 15.2%  | 6163  | 17.0%  |
|                             | Hesitance        | 4186 | 73.3%  | 25871   | 84.8%  | 30057 | 83.0%  |
|                             |                  | 5708 | 100.0% | 30512   | 100.0% | 36220 | 100.0% |
